# Supplementary material for: Developing a Machine Learning System for Identification of Severe Hand, Foot, and Mouth Disease from Electronic Medical Record Data
Source: PubMed Central journal article supplement (PMC5703994; doi:10.1038/s41598-017-16521-z), 2017-11-27
Supplement: 41598_2017_16521_MOESM1_ESM.pdf [file 41598_2017_16521_MOESM1_ESM.pdf]

## **Developing a Machine Learning System for Identification of Severe Hand, Foot, and Mouth Disease from Electronic Medical Record Data**

Guangjian Liu<sup>1, †</sup>, Yi Xu<sup>2, †</sup>, Xinming Wang<sup>3, †</sup>, Xutian Zhuang<sup>3</sup>, Huiying Liang<sup>1</sup>, Yun Xi<sup>3</sup>, Fangqin Lin<sup>1</sup>, Liyan Pan<sup>1</sup>, Taishan Zeng<sup>4</sup>, Huixian Li<sup>1</sup>, Xiaojun Cao<sup>5</sup>, Gansen Zhao<sup>3,\*</sup>, Huimin Xia<sup>6,\*</sup>

<sup>1</sup>Institute of Pediatrics, Guangzhou Women and Children's Medical Center, Guangzhou Medical University, Guangzhou, China;

<sup>2</sup>Department of Infectious Diseases, Guangzhou Women and Children's Medical Center, Guangzhou Medical University, Guangzhou, China;

<sup>3</sup>School of Computer, South China Normal University, Guangzhou, China;

<sup>4</sup>School of Mathematical Sciences, South China Normal University, Guangzhou, China;

<sup>5</sup>Department of Research, Education and Data Management, Guangzhou Women and Children's Medical Center, Guangzhou Medical University, Guangzhou, China;

<sup>6</sup>Department of Pediatric Surgery, Guangzhou Women and Children's Medical Center, Guangzhou Medical University, Guangzhou, China.

† Guangjian Liu, Yi Xu, and Xinming Wang contributed equally to this work.

\*Corresponding Authors:

Gansen Zhao, School of Computer, South China Normal University, 55 Zhongshan Road West, Guangzhou, China ([gzhao@m.scnu.edu.cn](mailto:gzhao@m.scnu.edu.cn));

Huimin Xia, Guangzhou Women and Children's Medical Center, 9 Jinsui Road, Guangzhou 510623, China ([xia-huimin@foxmail.com](mailto:xia-huimin@foxmail.com)).

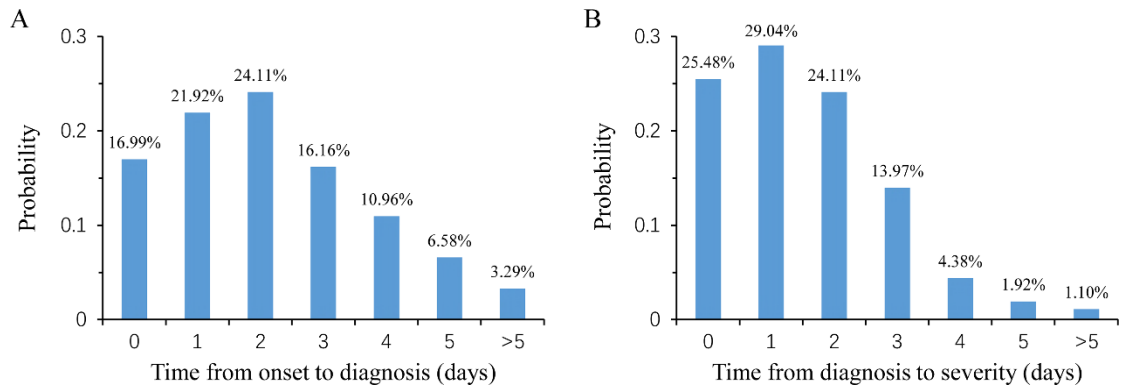

**Figure S1 Distributions of onset-to-diagnosis (A) and diagnosis-to-severity (B) time interval of severe cases (n=365) of hand, foot, and mouth disease.**

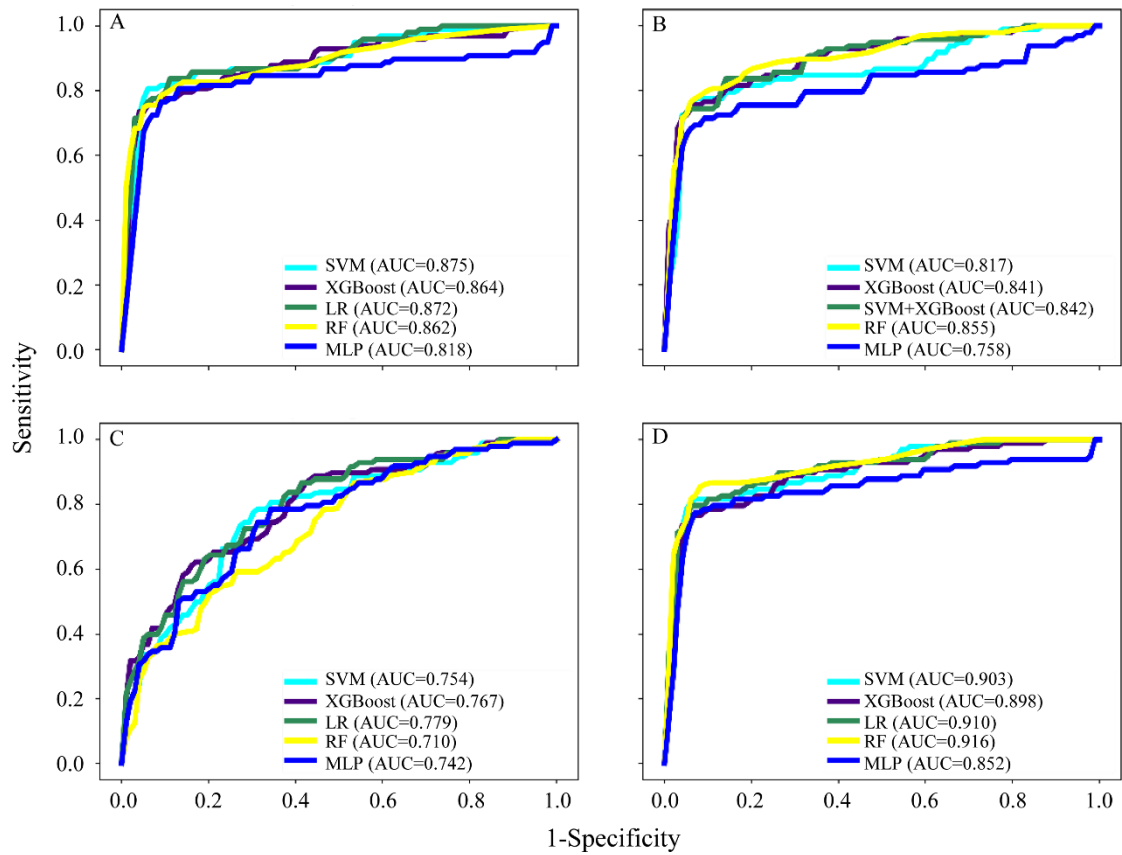

**Figure S2** The receiver operating characteristic curves with five machine learning algorithms for all the 153 variables (A), 11 structured variables (B), 5 unstructured variables (C) and 16 structured and unstructured variables (D). SVM, Support Vector Machine; LR, Logistic Regression; RF, Random Forest; MLP, Multi-Layer Perceptrons.
